# Supplementary material for: Uncovering the Grinnellian niche space of the cryptic species complex Gammarus roeselii
Source: PeerJ journal article supplement (doi:10.7717/peerj.15800), 2023-08-03
Supplement: FigureS1.pdf [file FigureS1.pdf]

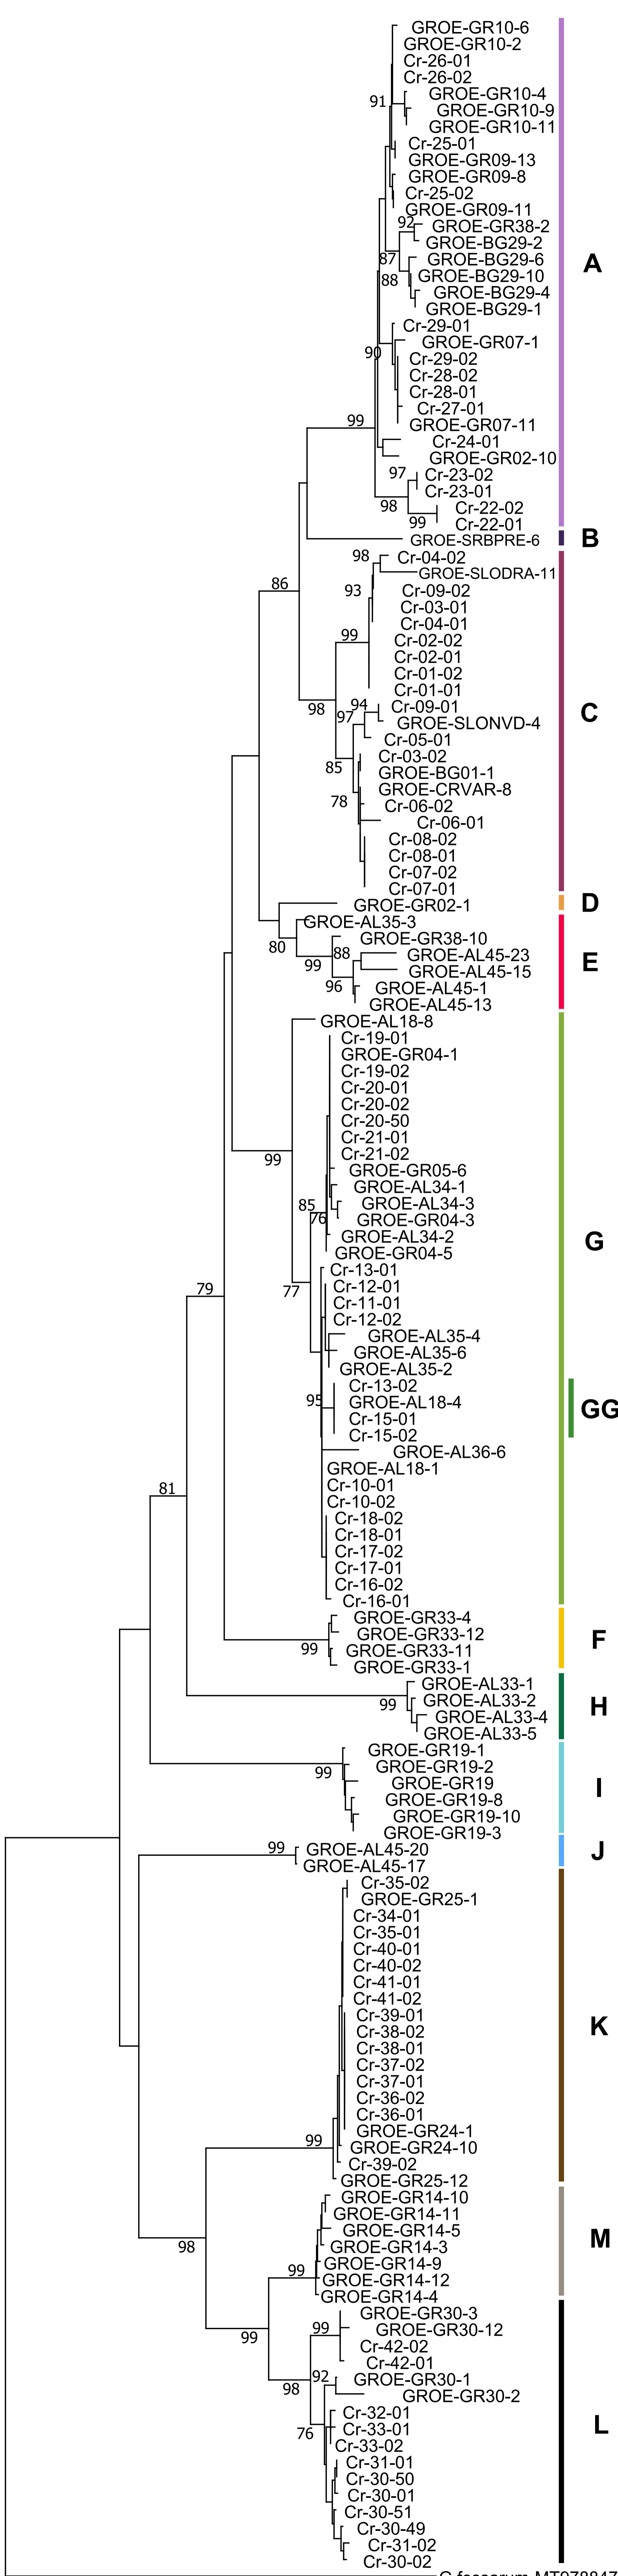

**A**

**B**

**C**

**D**

**E**

**G**

**GG**

**F**

**H**

**I**

**J**

**K**

**M**

**L**
