# Supplementary material for: Uncovering the Grinnellian niche space of the cryptic species complex Gammarus roeselii
Source: PeerJ journal article supplement (doi:10.7717/peerj.15800), 2023-08-03

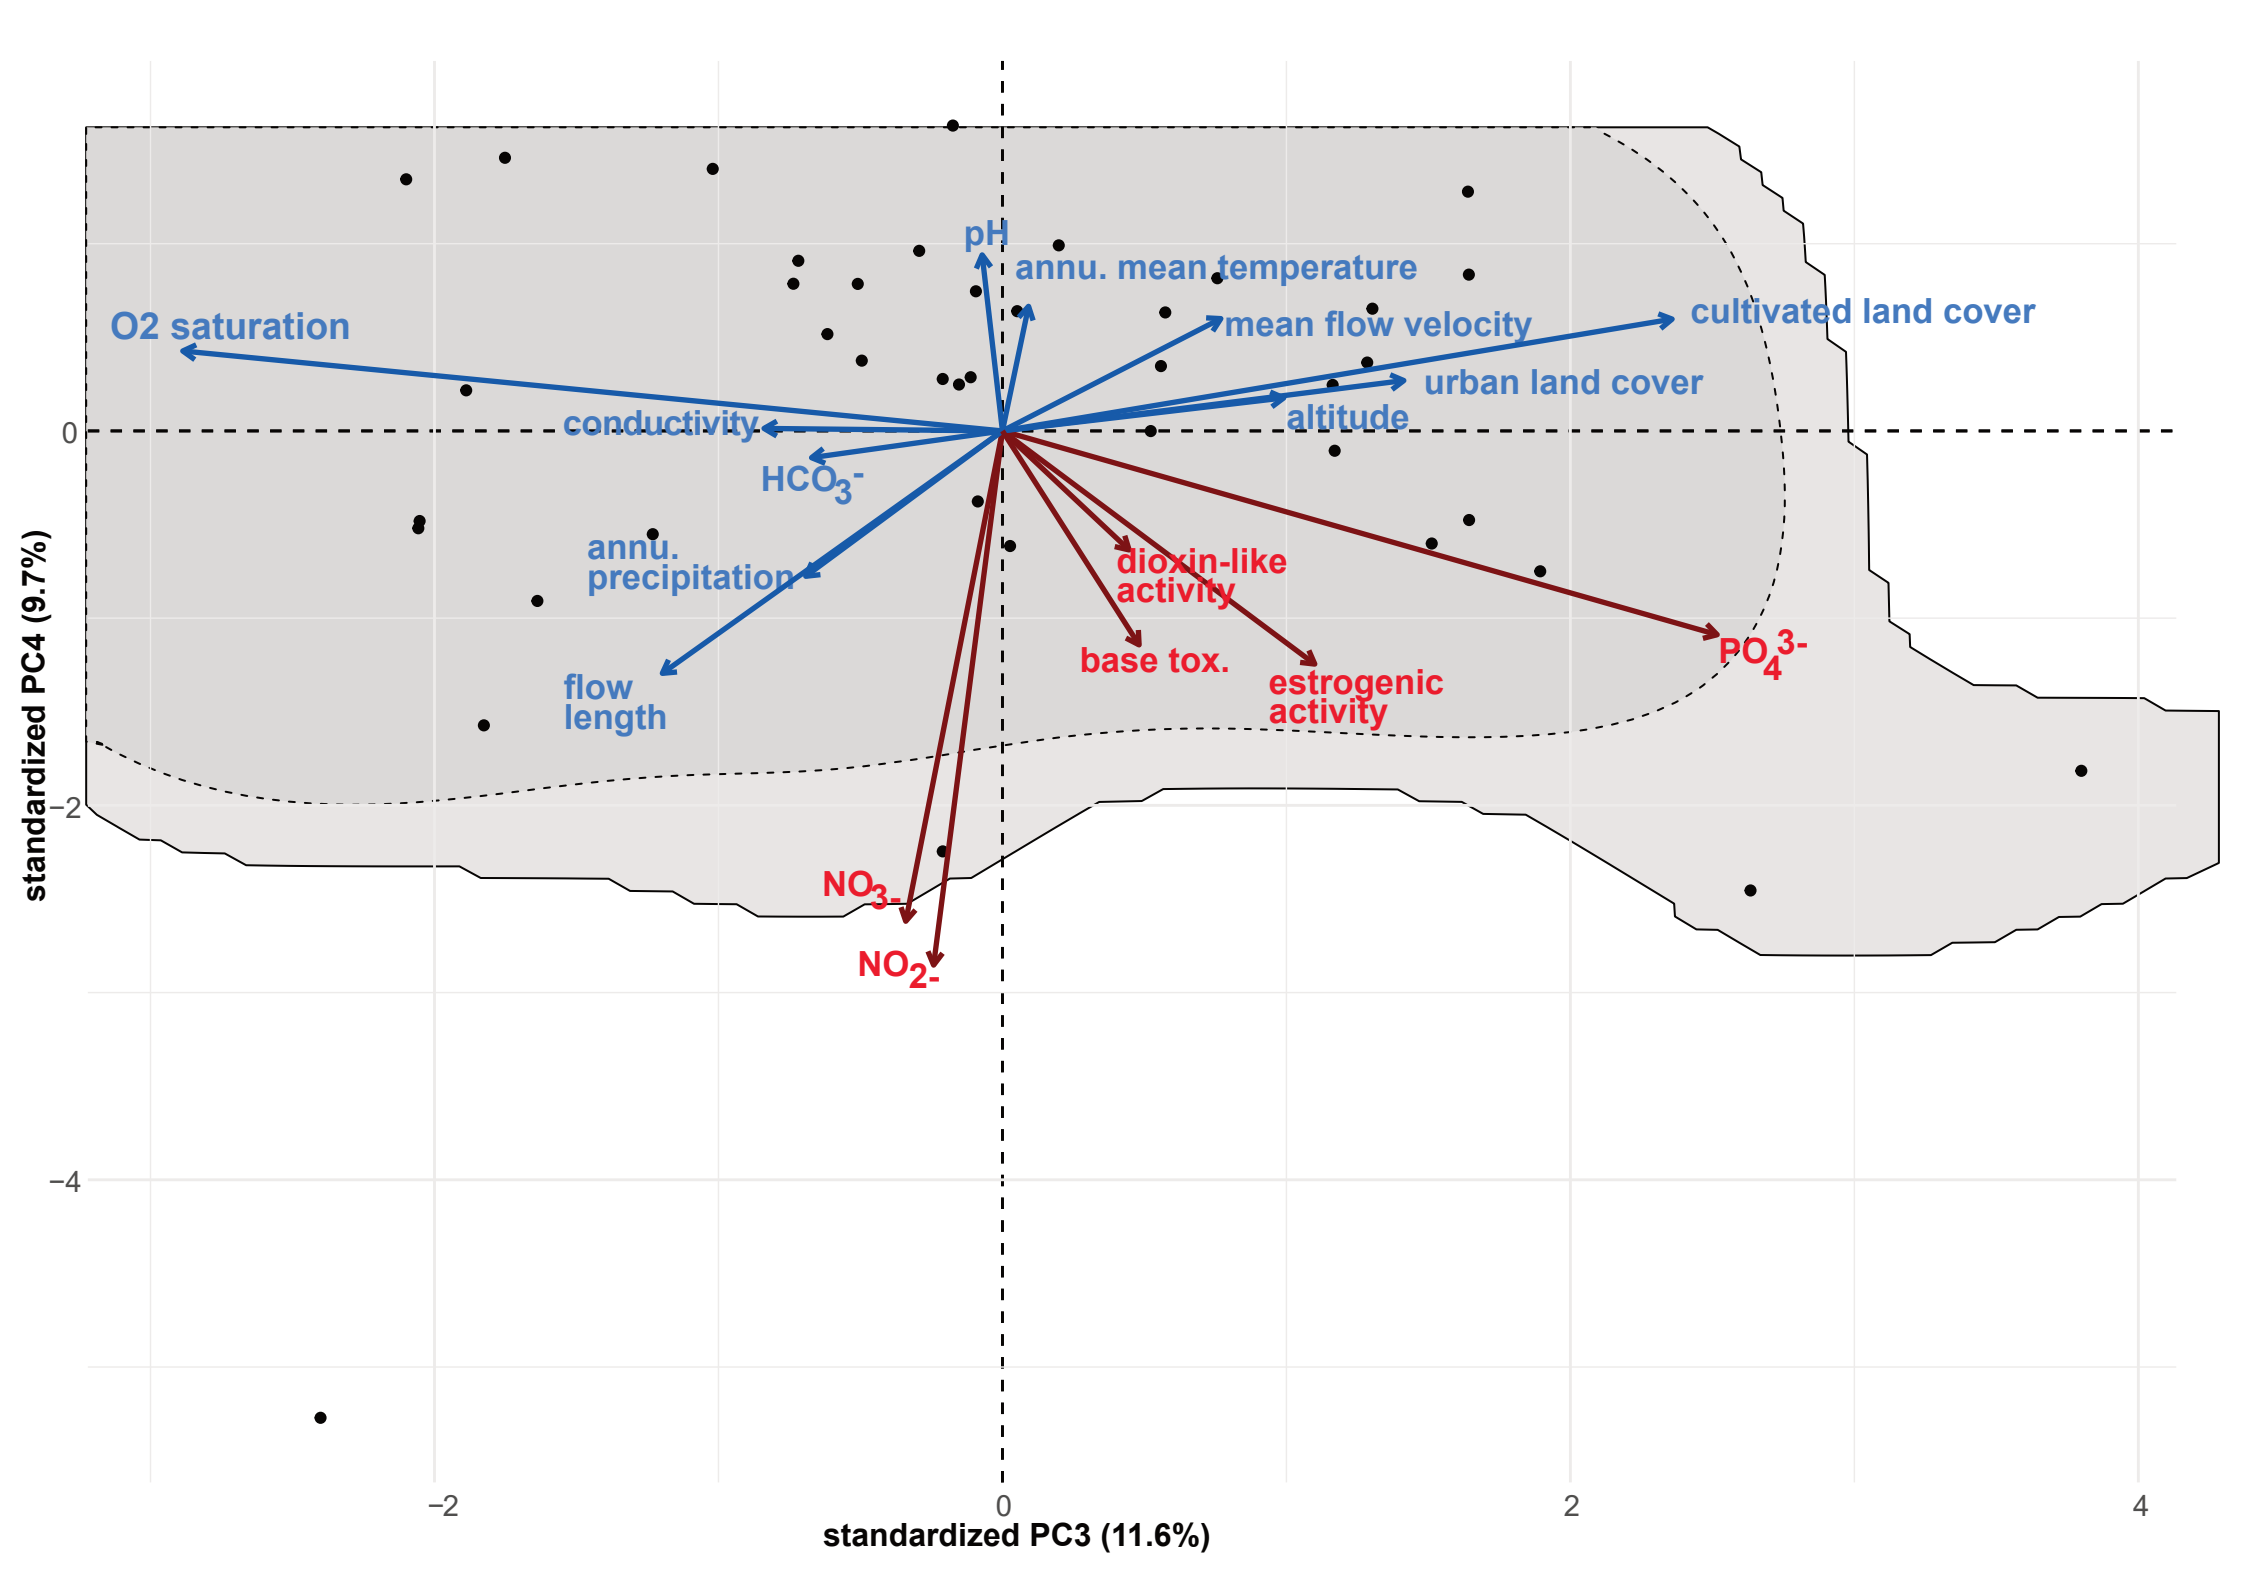

Supplement: FigureS3.pdf [file FigureS3.pdf]
