# Supplementary material for: Uncovering the Grinnellian niche space of the cryptic species complex Gammarus roeselii
Source: PeerJ journal article supplement (doi:10.7717/peerj.15800), 2023-08-03
Supplement: FigureS4.pdf [file FigureS4.pdf]

C

|              |      |
|--------------|------|
| unfilling    | 0.51 |
| stability    | 0.67 |
| expansion    | 0.33 |
| Schoener's D | 0.25 |
| Warren's I   | 0.36 |

|              |       |
|--------------|-------|
| unfilling    | 0.52  |
| stability    | 0.34  |
| expansion    | 0.66  |
| Schoener's D | 0.14  |
| Warren's I   | 0.18* |

|              |      |
|--------------|------|
| unfilling    | 0.48 |
| stability    | 0.49 |
| expansion    | 0.52 |
| Schoener's D | 0.24 |
| Warren's I   | 0.28 |

|              |      |
|--------------|------|
| unfilling    | 0.06 |
| stability    | 0.68 |
| expansion    | 0.32 |
| Schoener's D | 0.55 |
| Warren's I   | 0.69 |

G

|              |      |
|--------------|------|
| unfilling    | 0.04 |
| stability    | 0.59 |
| expansion    | 0.41 |
| Schoener's D | 0.31 |
| Warren's I   | 0.52 |

|              |      |
|--------------|------|
| unfilling    | 0.01 |
| stability    | 0.80 |
| expansion    | 0.20 |
| Schoener's D | 0.63 |
| Warren's I   | 0.78 |

|              |      |
|--------------|------|
| unfilling    | 0.20 |
| stability    | 0.49 |
| expansion    | 0.51 |
| Schoener's D | 0.30 |
| Warren's I   | 0.45 |

A

|              |      |
|--------------|------|
| unfilling    | 0.24 |
| stability    | 0.95 |
| expansion    | 0.51 |
| Schoener's D | 0.49 |
| Warren's I   | 0.66 |

|              |      |
|--------------|------|
| unfilling    | 0.48 |
| stability    | 0.67 |
| expansion    | 0.33 |
| Schoener's D | 0.25 |
| Warren's I   | 0.38 |

L

|              |      |
|--------------|------|
| unfilling    | 0.41 |
| stability    | 0.57 |
| expansion    | 0.43 |
| Schoener's D | 0.31 |
| Warren's I   | 0.40 |

K

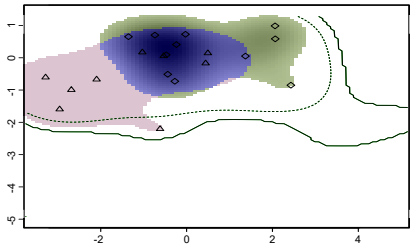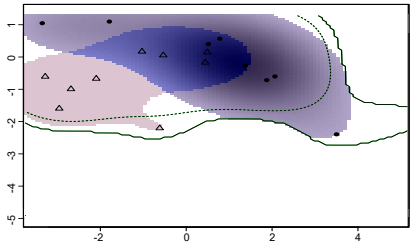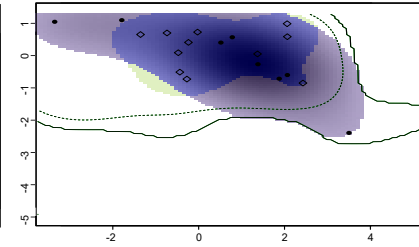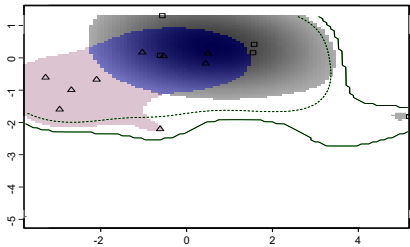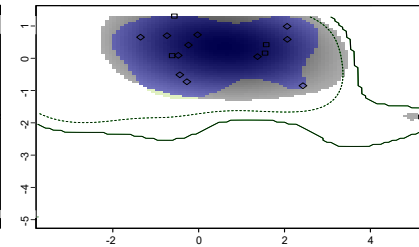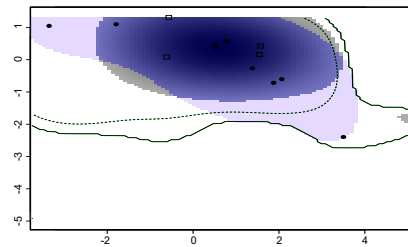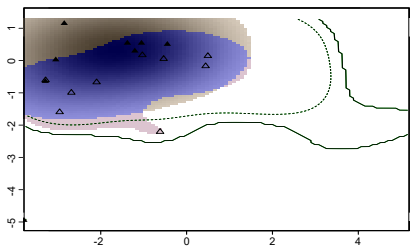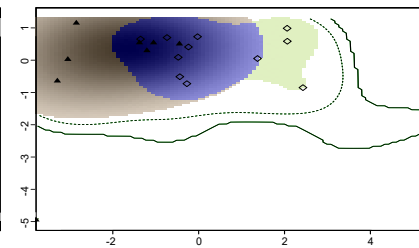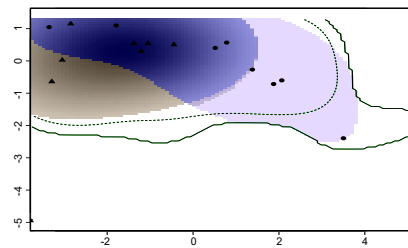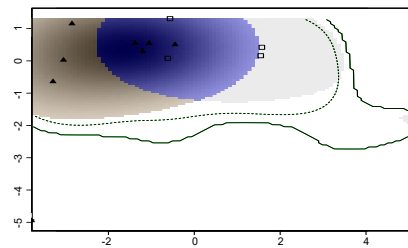

PC3 (11.6 %)

PC4 (9.7 %)
